# Supplementary material
Source: ML conference proceedings conference paper supplement (https://openaccess.thecvf.com/content/CVPR2022/html/Yan_ONCE-3DLanes_Building_Monocular_CVPR_2022_paper.html)
Supplement: Supplementary file 1 [file Yan_ONCE-3DLanes_Building_Monocular_CVPR_2022_supplemental.pdf]

# ONCE-3DLanes: Building Monocular 3D Lane Detection: Supplementary material

Fan Yan<sup>1\*</sup> Ming Nie<sup>1\*</sup> Xinyue Cai<sup>2</sup> Jianhua Han<sup>2</sup> Hang Xu<sup>2</sup> Zhen Yang<sup>2</sup>  
Chaoqiang Ye<sup>2</sup> Yanwei Fu<sup>1</sup> Michael Bi Mi<sup>2</sup> Li Zhang<sup>1†</sup>

<sup>1</sup>School of Data Science, Fudan University <sup>2</sup>Huawei Noah’s Ark Lab

<https://once-3dlanes.github.io>

## 1. Dataset

Our dataset and code will be made publicly available at <https://once-3dlanes.github.io>.

## 2. Further analysis

We conduct ablation studies to show the rationality of our experiment settings including loss function, backbone network and regression method.

**Loss function** As shown in Table 1, for the spatial contextual branch, we study different loss functions. Results show the smooth L1 loss outperforms L1 and L2 loss functions at all metrics.

**Backbone network** We compare the SegFormer [4] with Unet [1] for the backbone network. Moreover, different attention mechanisms [2, 3] are added to Unet to help learn the global information of lane structures. Table 2 shows that model with SegFormer beat the variants of Unet by a clear margin.

**Regression method** We also conduct an ablation study to evaluate the way to predict the depth information in Table 3. Our method regress in a residual manner is referred as *relative* method, and the method directly regress the depth information without pre-defined shift and scale is called *absolute* method. Table 3 shows the *relative* outperforms *absolute* by a large margin.

## 3. More qualitative results

We present the qualitative results of SALAD lane prediction in Figure 1. 2D projections are shown in the left and 3D visualizations are presented in the right.

\*The first two authors contributed equally to this work.

†Li Zhang (lizhangfd@fudan.edu.cn) is the corresponding author at School of Data Science and Shanghai Key Laboratory of Intelligent Information Processing, Fudan University

| Loss function | F1(%)        | Precision(%) | Recall(%)    | CD error(m)  |
|---------------|--------------|--------------|--------------|--------------|
| L1            | 63.47        | 75.08        | 54.97        | 0.101        |
| L2            | 62.91        | 74.55        | 54.41        | 0.103        |
| Smooth L1     | <b>64.07</b> | <b>75.90</b> | <b>55.42</b> | <b>0.098</b> |

Table 1. Ablation studies on loss functions in the spatial contextual branch.

| Backbone            | F1(%)        | Precision(%) | Recall(%)    | CD error(m)  |
|---------------------|--------------|--------------|--------------|--------------|
| Unet [1]            | 61.12        | 73.47        | 52.32        | 0.105        |
| Unet+self-att. [2]  | 62.71        | 74.41        | 54.19        | 0.101        |
| Unet+axial-att. [3] | 63.15        | 74.81        | 54.64        | 0.101        |
| SegFormer-B2 [4]    | <b>64.07</b> | <b>75.90</b> | <b>55.42</b> | <b>0.098</b> |

Table 2. Ablation studies on backbone networks.

| Offset option   | F1(%)        | Precision(%) | Recall(%)    | CD error(m)  |
|-----------------|--------------|--------------|--------------|--------------|
| <i>absolute</i> | 62.37        | 74.07        | 53.86        | 0.104        |
| <i>relative</i> | <b>64.07</b> | <b>75.90</b> | <b>55.42</b> | <b>0.098</b> |

Table 3. Ablation studies on depth regression methods.

## References

- [1] Olaf Ronneberger, Philipp Fischer, and Thomas Brox. U-net: Convolutional networks for biomedical image segmentation. In *MICCAI*, 2015. 1
- [2] Ashish Vaswani, Noam M. Shazeer, Niki Parmar, Jakob Uszkoreit, Llion Jones, Aidan N. Gomez, Lukasz Kaiser, and Illia Polosukhin. Attention is all you need. In *NeurIPS*, 2017. 1
- [3] Huiyu Wang, Yukun Zhu, Bradley Green, Hartwig Adam, Alan Yuille, and Liang-Chieh Chen. Axial-deeplab: Stand-alone axial-attention for panoptic segmentation. In *ECCV*, 2020. 1
- [4] Enze Xie, Wenhai Wang, Zhiding Yu, Anima Anandkumar, Jose M Alvarez, and Ping Luo. Segformer: Simple and efficient design for semantic segmentation with transformers. *arXiv preprint arXiv:2105.15203*, 2021. 1

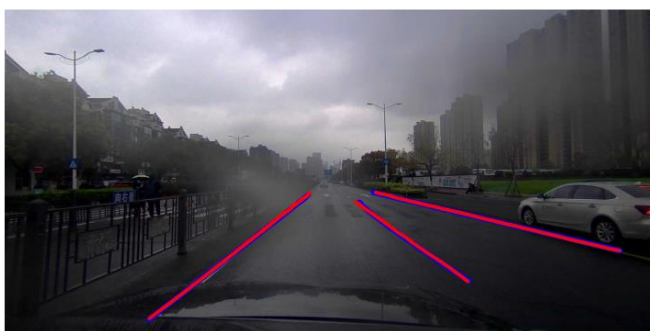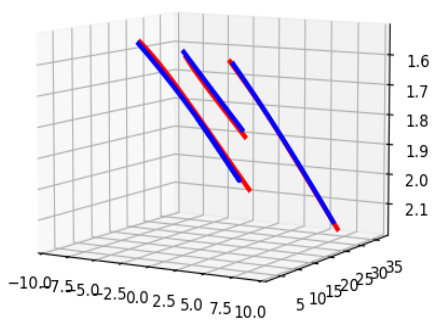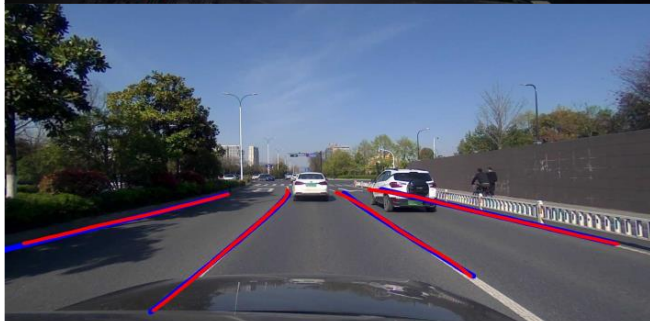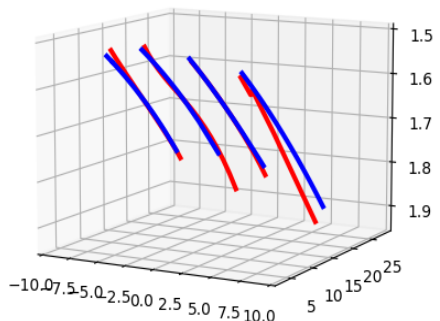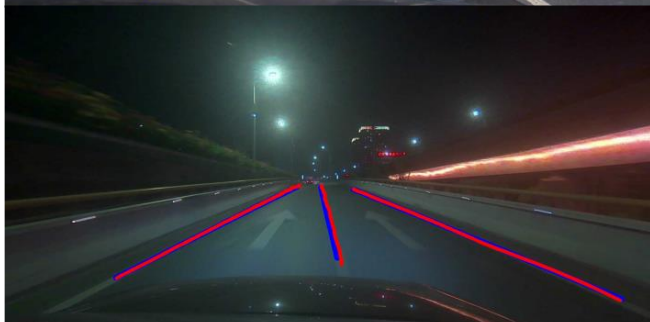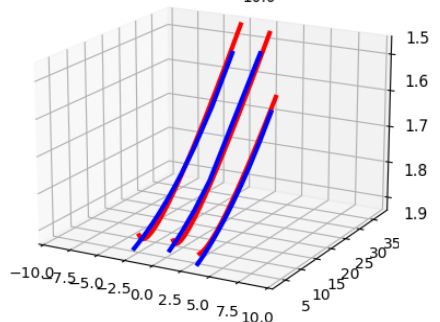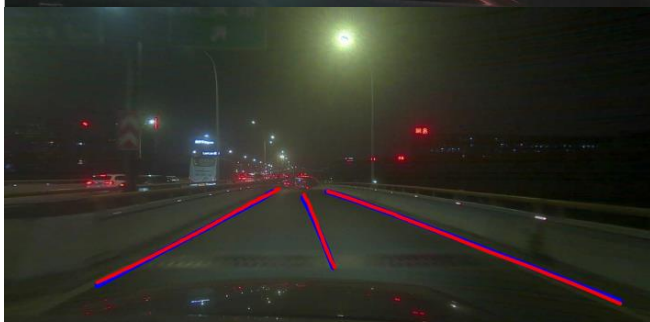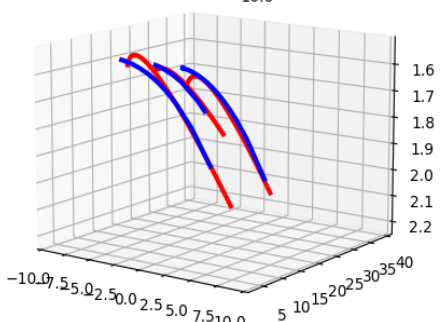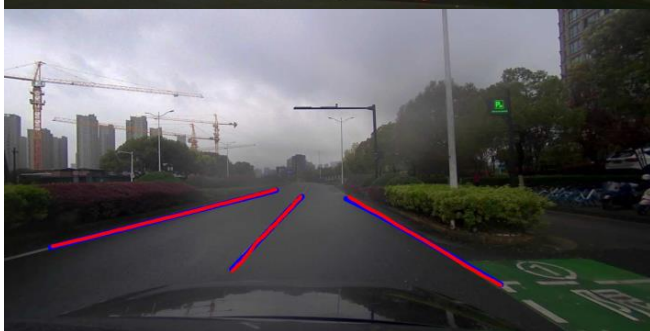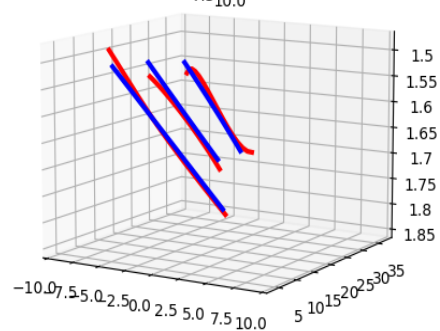

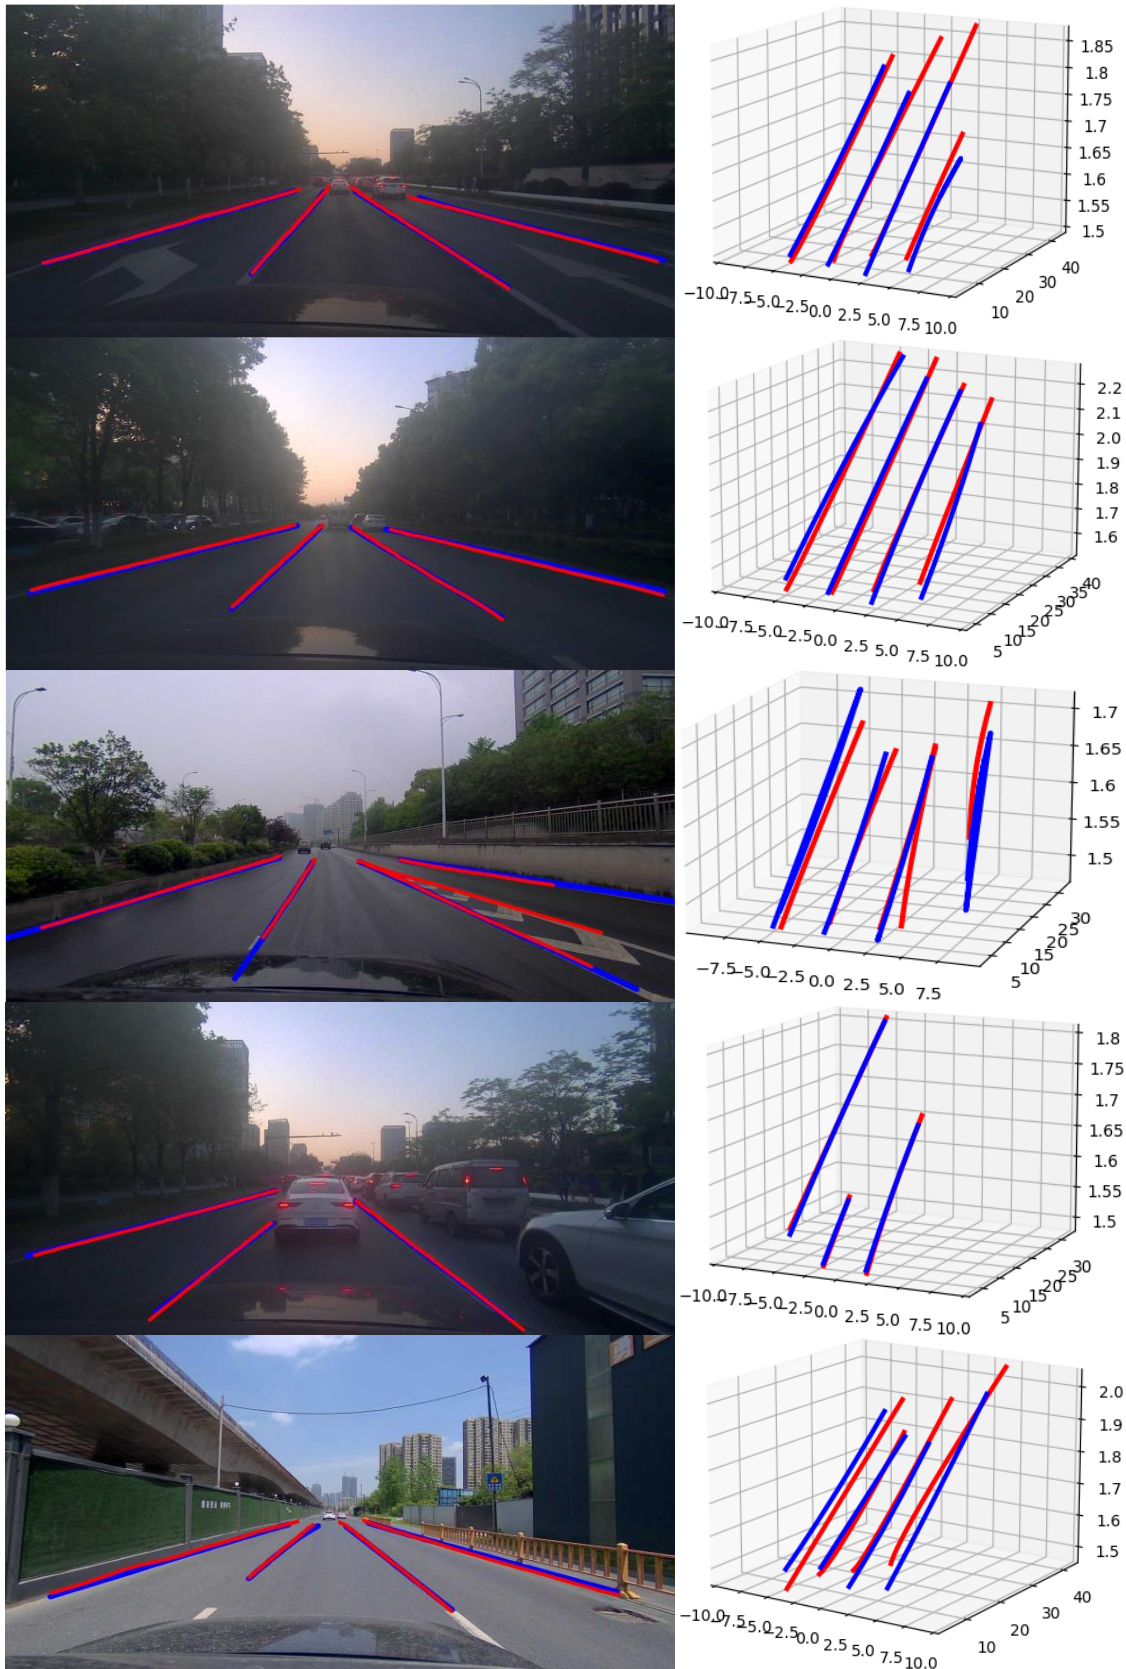

Figure 1. Visualization of *SALAD* on ONCE-3DLanes test set. The ground-truth lanes are colored in red while the predicted lanes are colored in blue. 2D projections are shown in the left and 3D visualizations in the right.
